# Supplementary material
Source: PubMed Central journal article supplement (PMC3981840)
Supplement: hvi-9-2317-s01.pdf [file hvi-9-2317-s01.pdf]

## **Supplemental Material to:**

**Anke Harenberg, Sarah Begue, Audrey Mamessier, Sophie Gimenez-Fourage, Ching Ching Seah, Ai Wei Liang, Jun Li Ng, Xue Yun Toh, Sophia Archuleta, Annelies Wilder-Smith, Lynette P Shek, Anh Wartel-Tram, Alain Bouckenoghe, Jean Lang, Denis Crevat, Catherine Caillet and Bruno Guy**

**Persistence of Th1/Tc1 responses one year after tetravalent dengue vaccination in adults and adolescents in Singapore**

**Human Vaccines & Immunotherapeutics 2013; 9(11)**

**<http://dx.doi.org/10.4161/hv.25562>**

**<http://www.landesbioscience.com/journals/vaccines/article/25562/>**

**Supplementary Table 1:** Ratio of corrected IFN $\gamma$  / corrected TNF $\alpha$  secretion measured by Luminex in supernatants of PBMCs stimulated *in vitro* for 4 days with indicated antigens collected from vaccinees before and 28 days after first injection (V01 and V02) and third injection (V05 and V06) in adolescents and adult

|             |     | Live CYD-1  |             | Live CYD-2  |             | Live CYD-3  |             | Live CYD-4  |             | POS CTRL    |             |
|-------------|-----|-------------|-------------|-------------|-------------|-------------|-------------|-------------|-------------|-------------|-------------|
|             |     | CYD-TDV     | CTRL        |
| Adolescents | V01 | 0.618       | 1.00        | 0.703       | 1.00        | 0.791       | 1.00        | 0.813       | 1.00        | 0.555       | 0.502       |
|             | V02 | <b>2.78</b> | 0.244       | <b>1.76</b> | 0.228       | <b>1.63</b> | 0.848       | <b>4.34</b> | 0.265       | 0.634       | 0.563       |
|             | V05 | 0.878       | <b>1.12</b> | <b>1.22</b> | <b>1.45</b> | <b>1.26</b> | 0.528       | <b>2.09</b> | 0.382       | <b>1.13</b> | <b>1.17</b> |
|             | V06 | <b>2.15</b> | 0.618       | <b>7.35</b> | 0.719       | <b>4.33</b> | <b>1.19</b> | <b>2.07</b> | <b>2.29</b> | <b>1.32</b> | 0.922       |
| Adults      | V01 | 0.637       | 0.516       | 0.994       | <b>1.01</b> | 0.748       | 1.21        | 1.04        | 0.888       | <b>1.88</b> | <b>2.45</b> |
|             | V02 | <b>5.25</b> | <b>2.00</b> | <b>7.63</b> | <b>1.50</b> | <b>7.40</b> | 0.626       | <b>8.67</b> | 0.616       | <b>2.27</b> | <b>2.07</b> |
|             | V05 | <b>1.55</b> | 1.00        | <b>3.89</b> | 1.00        | <b>4.62</b> | 1.00        | <b>5.62</b> | 0.292       | <b>2.47</b> | <b>1.96</b> |
|             | V06 | <b>1.29</b> | 0.044       | <b>4.52</b> | 0.610       | <b>1.97</b> | 0.366       | <b>6.81</b> | 0.193       | <b>2.62</b> | <b>2.79</b> |

Ratios > 1 are highlighted in bold
